# Supplementary material for: Glycosylation of Receptor Binding Domain of SARS-CoV-2 S-Protein Influences on Binding to Immobilized DNA Aptamers
Source: MDPI journal article supplement (doi:10.3390/ijms23010557), 2022-01-05
Supplement: s1 [file s1]

## Glycosylation of Receptor Binding Domain of SARS-CoV-2 S-Protein Influences on Binding to Immobilized DNA Aptamers

Fedor Grabovenko, Liudmila Nikiforova, Bogdan Yanenko, Andrey Ulitin<sup>2</sup>, Evgeniy Loktyushov, Timofei Zatsepin, Elena Zavyalova and Maria Zvereva

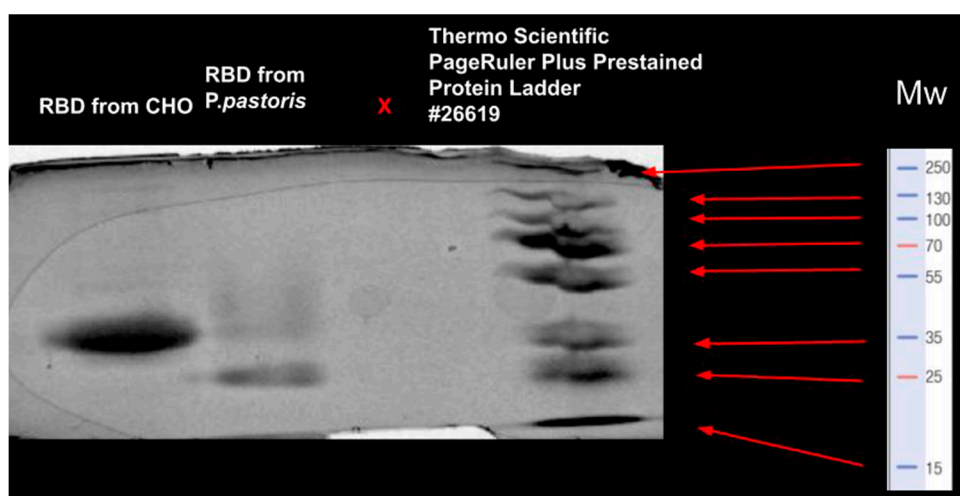

**Figure S1.** Denaturing polyacrylamide electrophoresis of RBD proteins from CHO cell line and *P. pastoris*. Unprocessed protein runs at 25 kDa, glycosylated proteins run at 35-45 kDa.

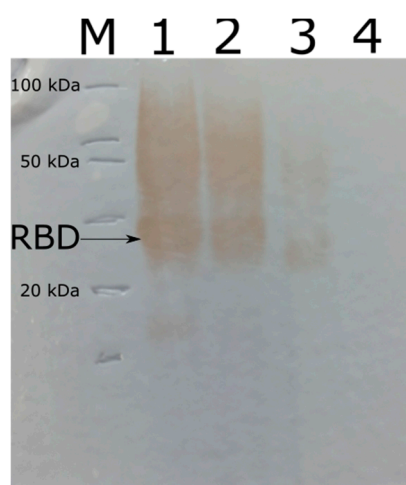

**Figure S2.** Western blot analysis of RBD protein *P. pastoris*. The track M – molecular weight ladder transferred from polyacrylamide gel; tracks 1-3 RBD protein from *P. pastoris* in different concentrations (1>2>3). The track 4 – BSA.

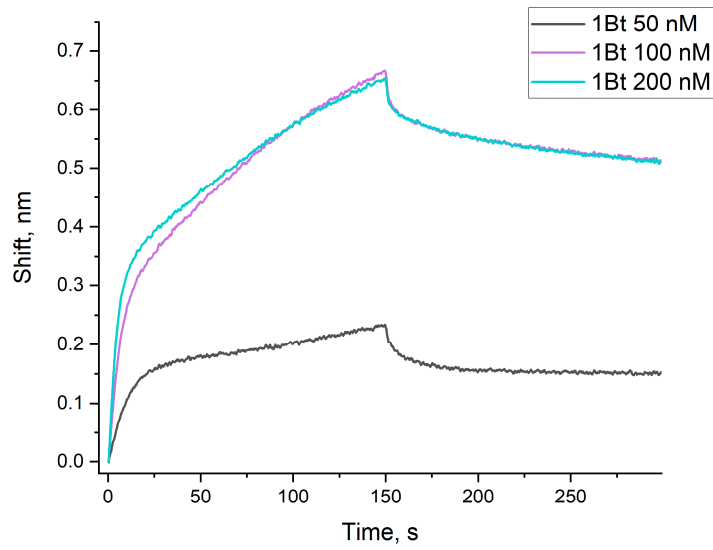

**Figure S3.** Binding curves of RBD expressed in *P. pastoris* to immobilized aptamer CoV2-RBD-1C-Biotin.

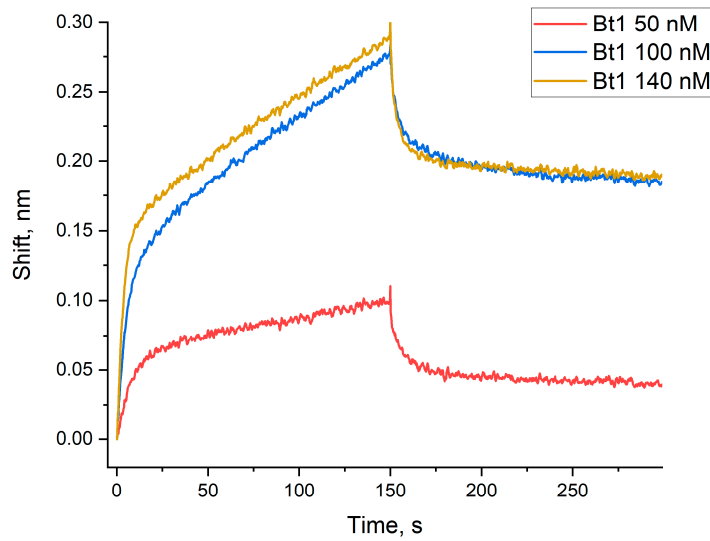

**Figure S4.** Binding curves of RBD expressed in *P. pastoris* to immobilized aptamer Biotin-CoV2-RBD-1C.

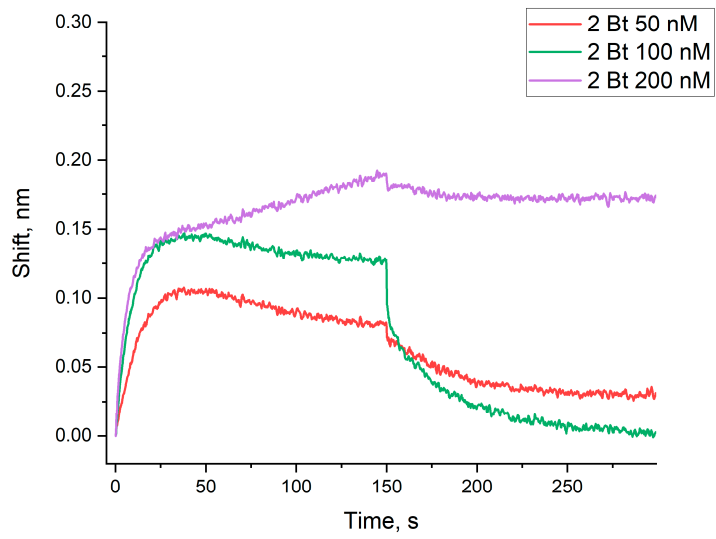

**Figure S5.** Binding curves of RBD expressed in *P. pastoris* to immobilized aptamer CoV2-RBD-2-Biotin.

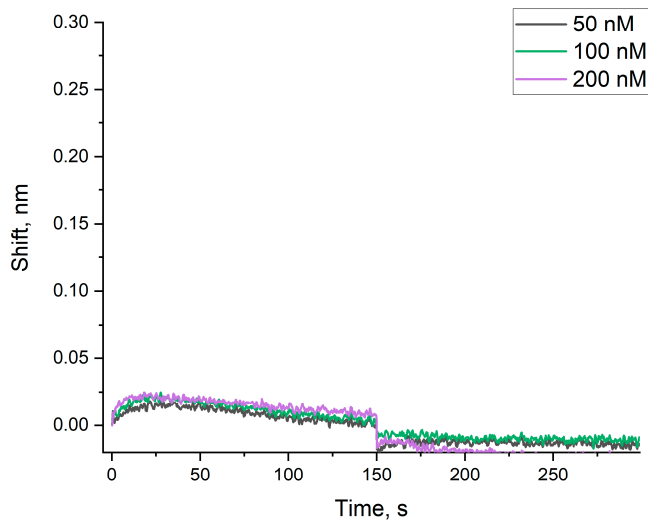

**Figure S6.** Binding curves of RBD expressed in *P. pastoris* to immobilized aptamer Biotin-CoV2-RBD-2.

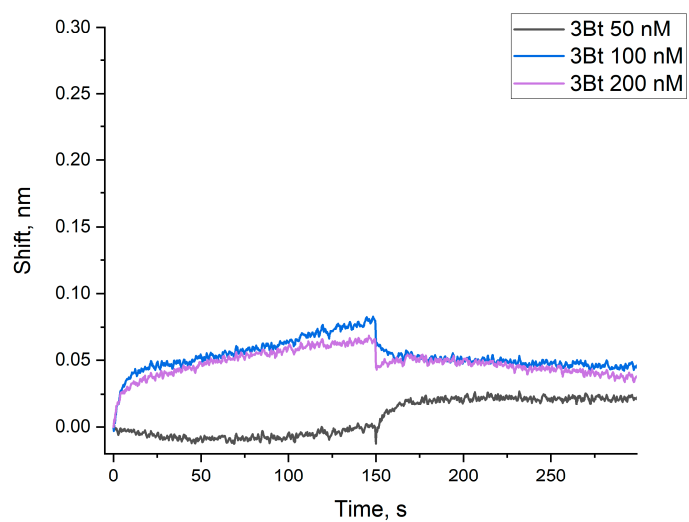

**Figure S7.** Binding curves of RBD expressed in *P. pastoris* to immobilized aptamer CoV2-RBD-3-Biotin.

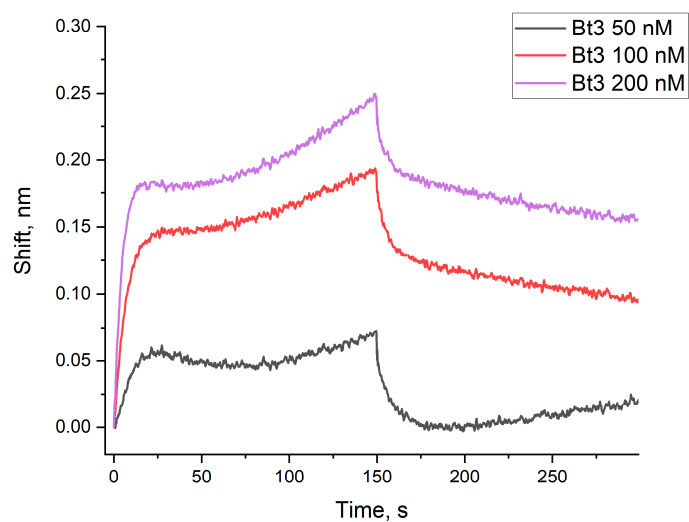

**Figure S8.** Binding curves of RBD expressed in *P. pastoris* to immobilized aptamer Biotin-CoV2-RBD-3.

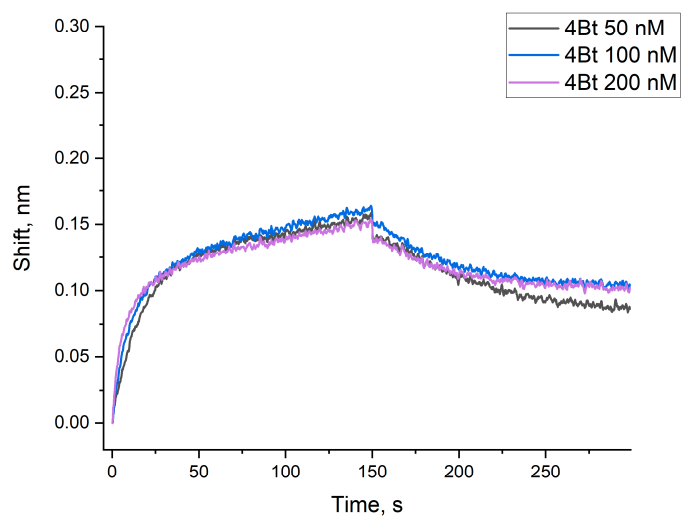

**Figure S9.** Binding curves of RBD expressed in *P. pastoris* to immobilized aptamer CoV2-RBD-4-Biotin.

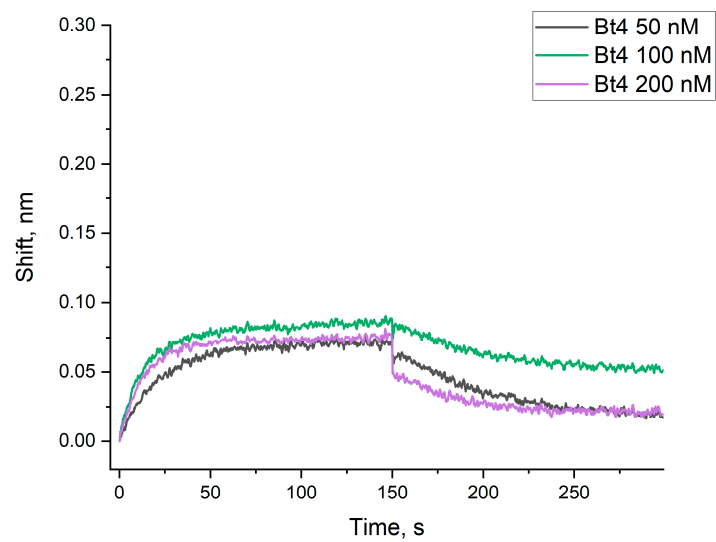

**Figure S10.** Binding curves of RBD expressed in *P. pastoris* to immobilized aptamer Biotin-CoV2-RBD-4.

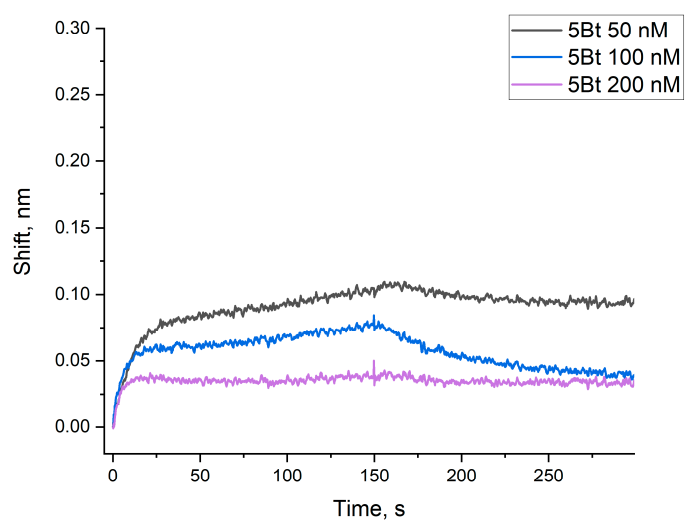

**Figure S11.** Binding curves of RBD expressed in *P. pastoris* to immobilized aptamer CoV2-RBD-5-Biotin.

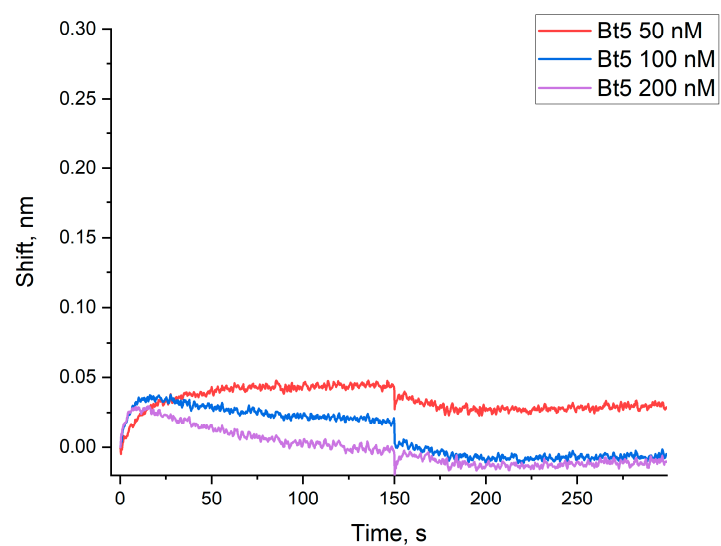

**Figure S12.** Binding curves of RBD expressed in *P. pastoris* to immobilized aptamer Biotin-CoV2-RBD-5.

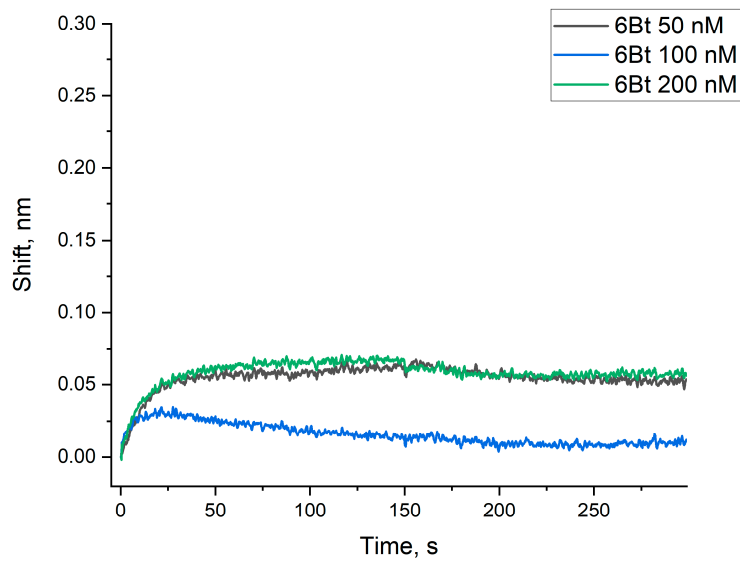

**Figure S13.** Binding curves of RBD expressed in *P. pastoris* to immobilized aptamer CoV2-RBD-6-Biotin.

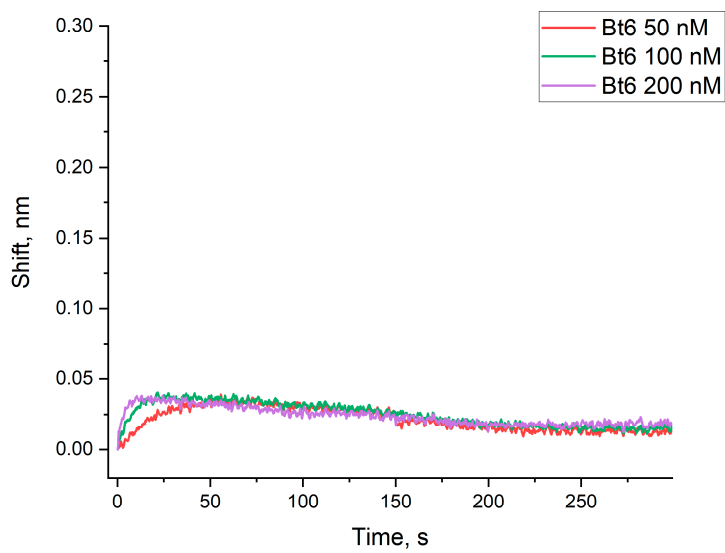

**Figure S14.** Binding curves of RBD expressed in *P. pastoris* to immobilized aptamer Biotin-CoV2-RBD-6.

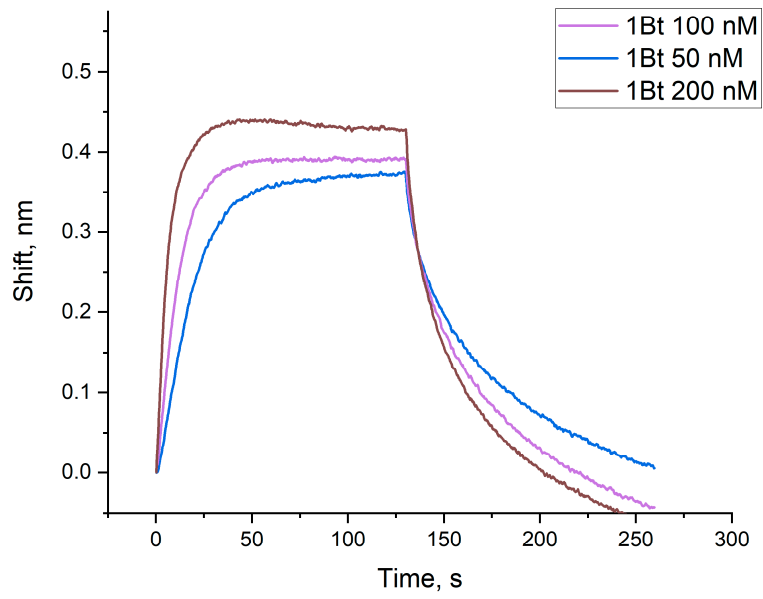

**Figure S15.** Binding curves of RBD expressed in CHO cell line to immobilized aptamer CoV2-RBD-1C-Biotin.

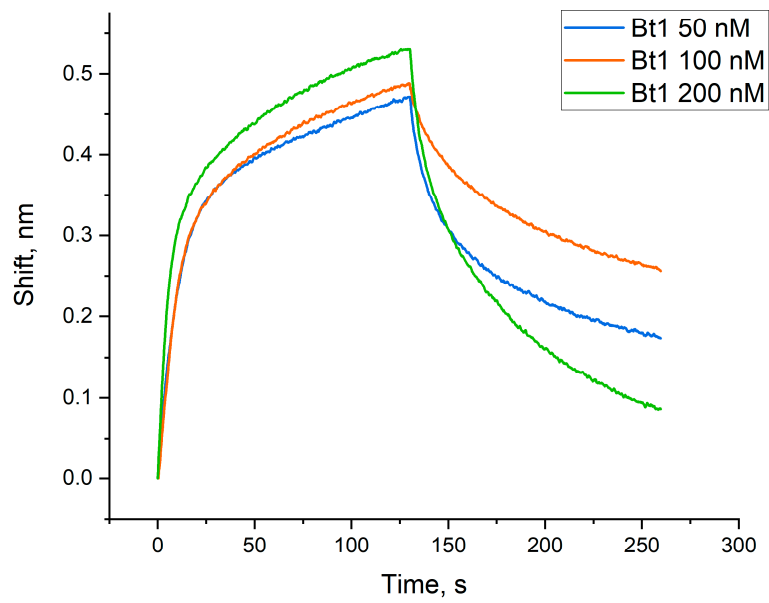

**Figure S16.** Binding curves of RBD expressed in CHO cell line to immobilized aptamer Biotin-CoV2-RBD-1C.



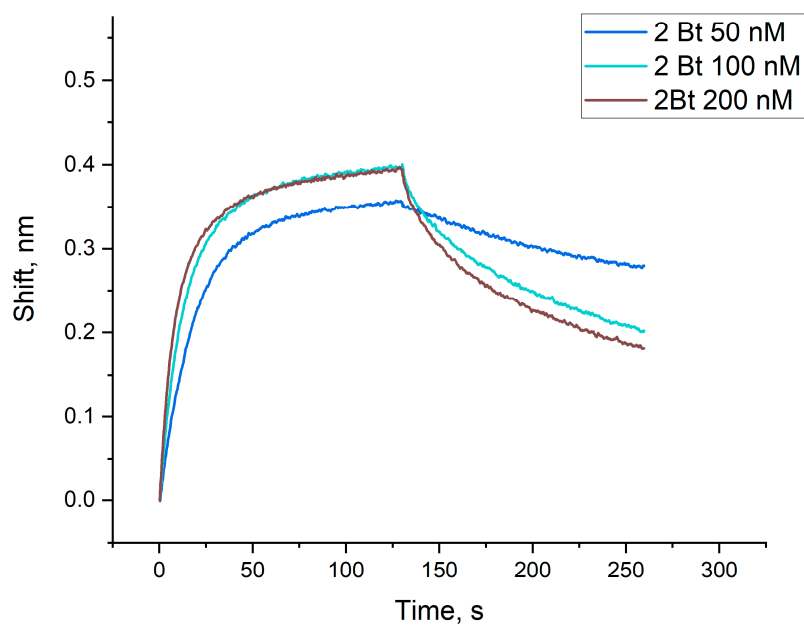

**Figure S17.** Binding curves of RBD expressed in CHO cell line to immobilized aptamer CoV2-RBD-2-Biotin.

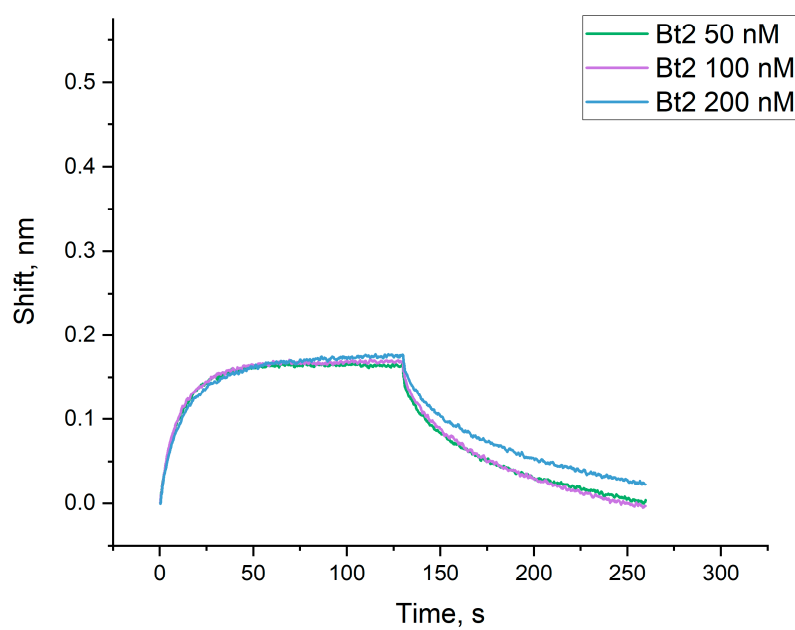

**Figure S18.** Binding curves of RBD expressed in CHO cell line to immobilized aptamer Biotin-CoV2-RBD-2.

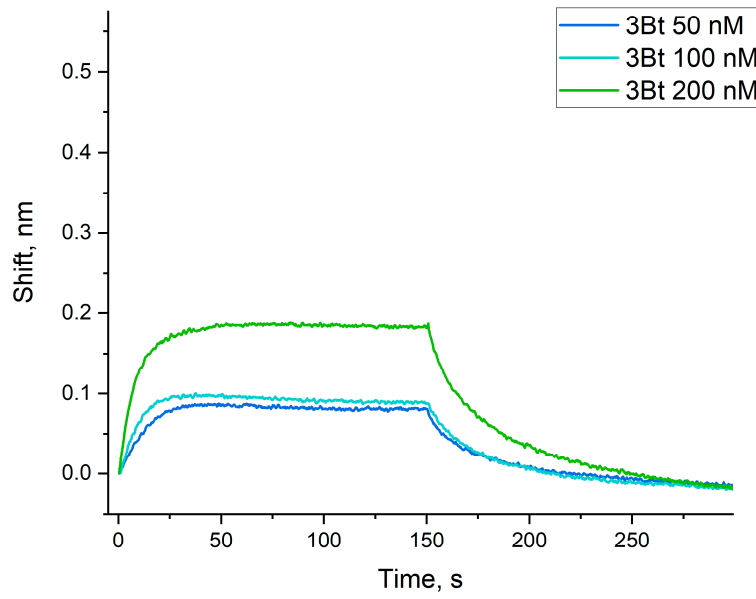

**Figure S19.** Binding curves of RBD expressed in CHO cell line to immobilized aptamer CoV2-RBD-3-Biotin.

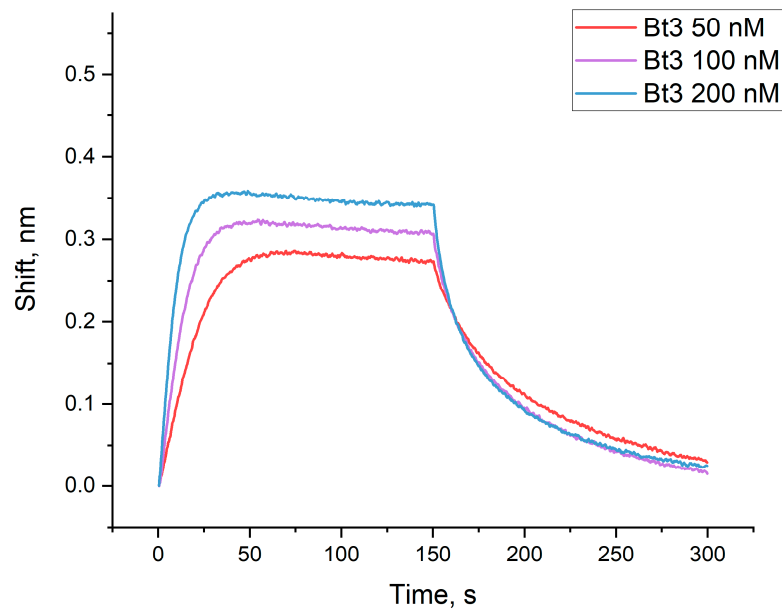

**Figure S20.** Binding curves of RBD expressed in CHO cell line to immobilized aptamer Biotin-CoV2-RBD-3.

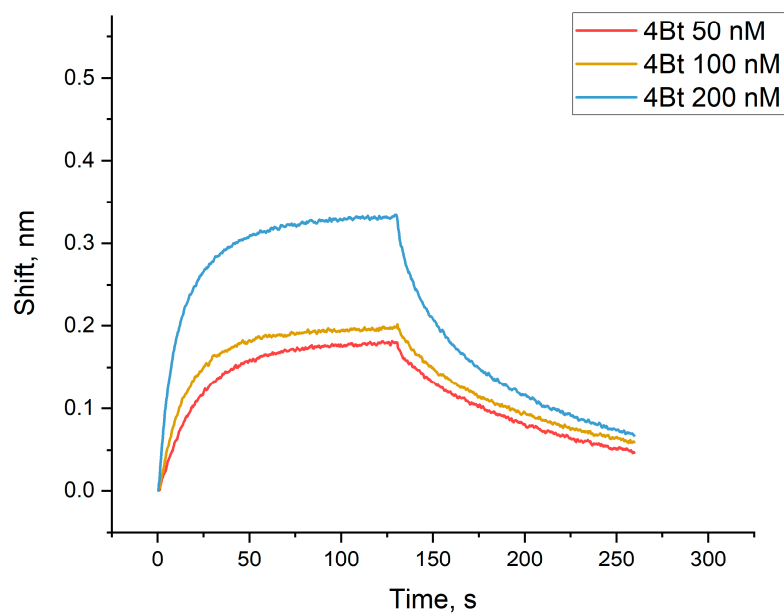

**Figure S21.** Binding curves of RBD expressed in CHO cell line to immobilized aptamer CoV2-RBD-4-Biotin.

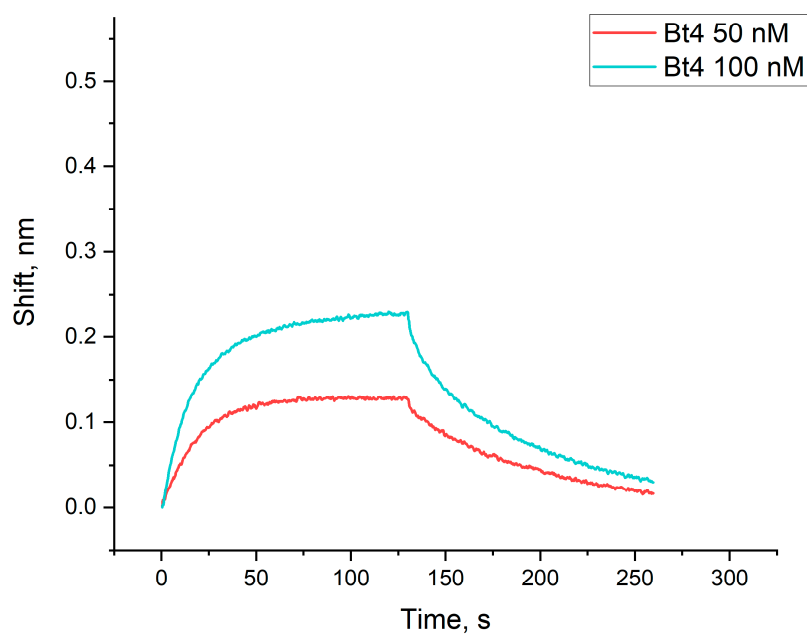

**Figure S22.** Binding curves of RBD expressed in CHO cell line to immobilized aptamer Biotin-CoV2-RBD-4.

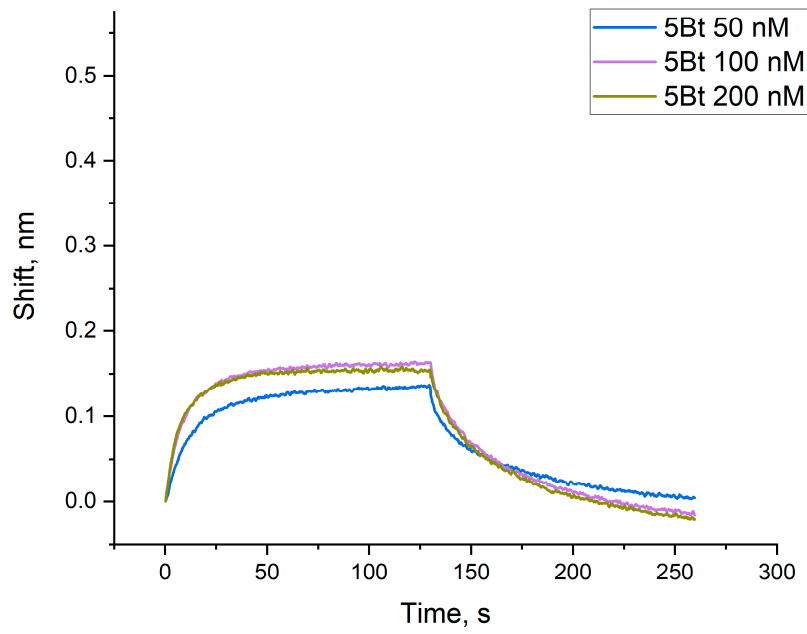

**Figure S23.** Binding curves of RBD expressed in CHO cell line to immobilized aptamer CoV2-RBD-5-Biotin.

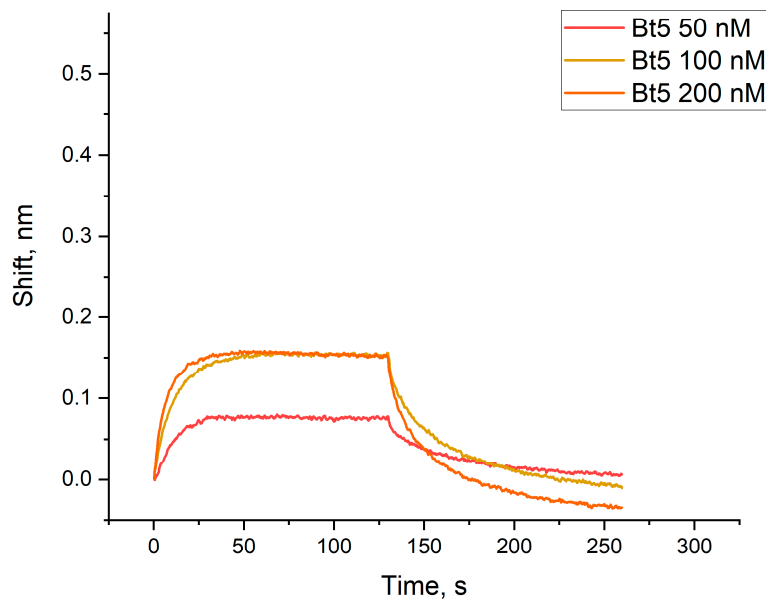

**Figure S24.** Binding curves of RBD expressed in CHO cell line to immobilized aptamer Biotin-CoV2-RBD-5.

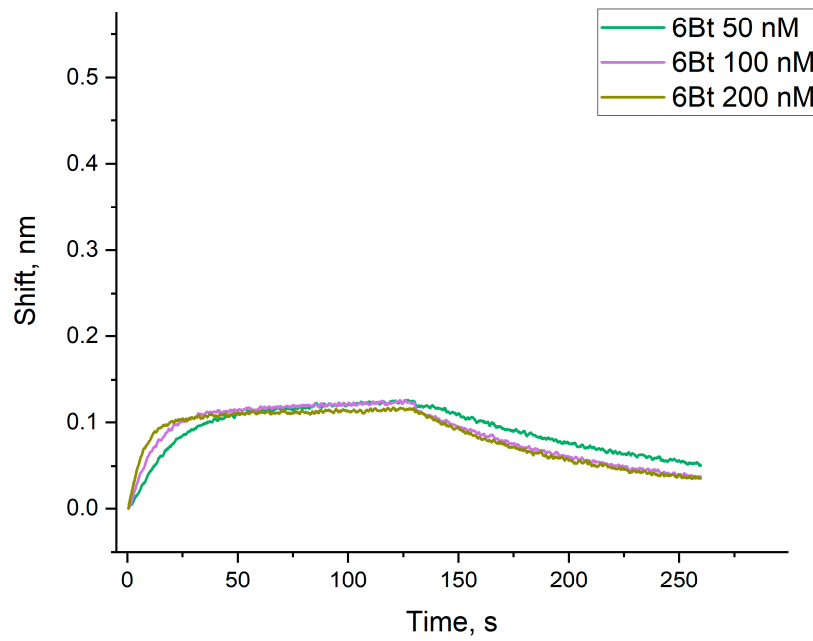

**Figure S25.** Binding curves of RBD expressed in CHO cell line to immobilized aptamer CoV2-RBD-6-Biotin.

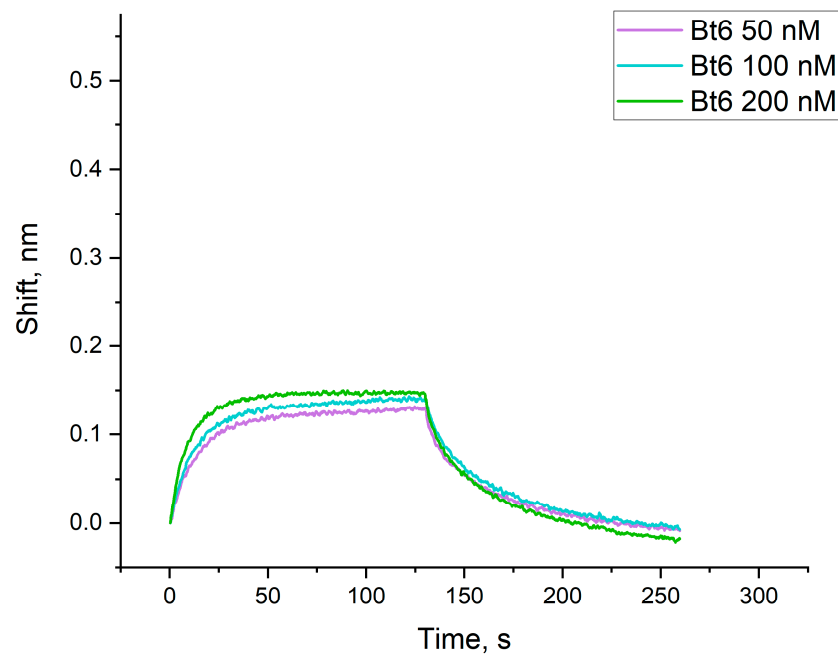

**Figure S26.** Binding curves of RBD expressed in CHO cell line to immobilized aptamer Biotin-CoV2-RBD-6.
